# Supplementary material for: The Re-Establishment of Desiccation Tolerance in Germinated Arabidopsis thaliana Seeds and Its Associated Transcriptome
Source: PLoS One. 2011 Dec 14;6(12):e29123. doi: 10.1371/journal.pone.0029123 (PMC3237594; doi:10.1371/journal.pone.0029123)
Supplement: Table S2 — Over-representation analysis of the differentially expressed genes after PEG treatment. The analyzed gene set was first filtered through a fold-change and variance cut-off based filter (fold change ≥2 and P-value ≤0.05). (XLS) [file pone.0029123.s003.xls]

## Sheet: Sheet1
UP-REGULATED GENE SUBSET
subcategory name	p-value	expected number of genes	observed number of genes	Ratio	GeneIDs of test set in subcategory
seed development	3.93912e-12	4.19077	27	6.44273	OBE2 SUS3 AT1G52690 AT5G44310 OLEO4 LEA14 AT3G22490 AT4G36600 AT1G72100 ATS1 AT3G53040 AT2G42560 AT4G21020 ATECP63 AT5G06760 AT1G32560 AT2G35300 ATECP31 EM1 AT3G17520 GEA6 ATPER1 AT3G15670 OLEO2 M10 CRU3 OLEO1
response to abscisic acid stimulus	1.34401e-08	2.79385	19	6.80065	CRU2 ATDI19 ATFER2 LTI78 ATDI21 EEL ATHVA22B AHG1 LTI30 ATS1 LTI65 AT1G05510 EM1 GEA6 ATPER1 AT2G47770 CRU3 RAB18 CRA1
lipid storage	3.56966e-08	0.169896	7	41.2017	AT1G48990 AT5G56100 OLEO4 AT2G25890 OLEO2 AT3G01570 OLEO1
embryonic development	4.2188e-08	4.11526	22	5.34596	OBE2 ATDI21 AT1G52690 AT5G44310 LEA14 AT3G22490 AT4G36600 AT1G72100 ATS1 AT3G53040 AT2G42560 AT4G21020 ATECP63 AT5G06760 AT1G32560 AT2G35300 ATECP31 EM1 AT3G17520 AT3G15670 CRU3 M17
embryonic development ending in seed dormancy	1.21718e-07	3.55838	20	5.62054	OBE2 AT1G52690 AT5G44310 LEA14 AT3G22490 AT4G36600 AT1G72100 ATS1 AT3G53040 AT2G42560 AT4G21020 ATECP63 AT5G06760 AT1G32560 AT2G35300 ATECP31 EM1 AT3G17520 AT3G15670 CRU3
response to water	2.09582e-07	1.91605	15	7.82861	ATDI19 ERD7 AtGolS2 DREB2A LTI78 XERO1 AT3G02480 ATDI21 LEA14 LTI30 HIS1-3 LTI65 ATPER1 LEA RAB18
reproductive structure development	7.2944e-07	7.63588	28	3.6669	U2AF35B OBE2 SUS3 AT1G52690 AT5G44310 OLEO4 LEA14 AT3G22490 AT4G36600 AT1G72100 ATS1 AT3G53040 AT2G42560 AT4G21020 ATECP63 AT5G06760 AT1G32560 AT2G35300 ATECP31 EM1 AT3G17520 GEA6 ATPER1 AT3G15670 OLEO2 M10 CRU3 OLEO1
post-embryonic development	4.3759e-06	9.38204	30	3.1976	U2AF35B CRU2 OBE2 SUS3 AT1G52690 AT5G44310 OLEO4 SOM LEA14 AT3G22490 AT4G36600 AT1G72100 ATS1 AT3G53040 AT2G42560 AT4G21020 ATECP63 AT5G06760 AT1G32560 AT2G35300 ATECP31 EM1 AT3G17520 GEA6 ATPER1 AT3G15670 OLEO2 M10 CRU3 OLEO1
response to water deprivation	8.90702e-06	1.8311	13	7.09956	ATDI19 ERD7 AtGolS2 DREB2A LTI78 AT3G02480 ATDI21 LEA14 LTI30 HIS1-3 LTI65 ATPER1 RAB18
nutrient reservoir activity	3.33564e-05	0.254844	6	23.5438	CRU2 AT2G28490 AT5G54740 CRU3 PAP85 CRA1
response to abiotic stimulus	5.45354e-05	11.7323	32	2.72751	U2AF35B ADH1 VTE1 ATFP6 UBQ3 ATDI19 ERD7 AtGolS2 ATCYSB DREB2A ATDSI-1VOC LTI78 XERO1 AT3G02480 ATDI21 AtGolS1 AT1G16850 OLEO4 ATHVA22B LEA14 LTI30 HIS1-3 AT2G38905 LTI65 ATGSTF2 AT5G06760 ATPER1 AT2G47770 OLEO2 LEA OLEO1 RAB18
response to chemical stimulus	0.000130399	16.7064	39	2.33443	LBD40 ADH1 VTE1 CRU2 DYL1 ATDI19 ERD7 ATFER2 AT-E1_ALPHA AtGolS2 DREB2A ATEBP AT1G75490 LTI78 XERO1 AT3G02480 ATDI21 AtGolS1 EEL AT3G10020 ATHVA22B LEA14 AHG1 LTI30 HIS1-3 ATS1 LTI65 GASA3 ATGSTF2 AT3G56350 AT1G05510 EM1 GEA6 ATPER1 AT2G47770 CRU3 LEA RAB18 CRA1
response to stress	0.000253118	17.8391	40	2.24227	ADH1 VTE1 ATFP6 ATDI19 ERD7 ATFER2 AT2G15010 AtGolS2 VEP1 AT5G55240 PDF1.2b DREB2A ATEBP PDF2.1 LTI78 XERO1 AT3G02480 LCR67 ATDI21 AtGolS1 AT3G10020 AT1G16850 OLEO4 ATHVA22B LEA14 LTI30 HIS1-3 ATS1 AT2G38905 LTI65 ATGSTF2 AT3G56350 AT5G06760 AT3G58450 ATPER1 AT2G47770 OLEO2 LEA OLEO1 RAB18
multicellular organismal development	0.00051531	16.9896	38	2.23666	U2AF35B anac060 RTFL8 AT5G62800 CRU2 VEP1 OBE2 anac089 SUS3 ATDI21 AT1G52690 AT5G44310 OLEO4 SOM LEA14 AT3G22490 AT4G36600 AT1G72100 ATS1 AT3G53040 AT2G42560 AT4G21020 ATECP63 AT5G06760 AT1G32560 AT2G35300 ATECP31 EM1 AT3G17520 GEA6 ATPER1 AT3G15670 OLEO2 M10 AT5G54740 CRU3 OLEO1 M17
seed oilbody biogenesis	0.000659948	0.0377547	3	79.4603	OLEO4 OLEO2 OLEO1
response to temperature stimulus	0.000874084	3.63389	15	4.12781	VTE1 ATFP6 ERD7 DREB2A LTI78 AtGolS1 OLEO4 LTI30 AT2G38905 LTI65 ATGSTF2 AT5G06760 OLEO2 OLEO1 RAB18
developmental process	0.00157239	18.5281	39	2.10491	U2AF35B anac060 RTFL8 AT5G62800 CRU2 TET4 VEP1 OBE2 anac089 SUS3 ATDI21 AT1G52690 AT5G44310 OLEO4 SOM LEA14 AT3G22490 AT4G36600 AT1G72100 ATS1 AT3G53040 AT2G42560 AT4G21020 ATECP63 AT5G06760 AT1G32560 AT2G35300 ATECP31 EM1 AT3G17520 GEA6 ATPER1 AT3G15670 OLEO2 M10 AT5G54740 CRU3 OLEO1 M17
cellular macromolecule metabolic process (5.7%)	0.00171186	37.2827	15	0.402331	AT5G62800 AT2G24260 UBQ3 AT5G18450 AT2G41710 RAP2.9 WRKY32 DREB2A PIMT2 AT1G75490 SUS3 AT5G22470 EEL AT5G10120 SOM
response to hormone stimulus	0.00194248	7.63588	22	2.88113	LBD40 CRU2 ATDI19 ATFER2 ATEBP LTI78 ATDI21 EEL ATHVA22B AHG1 LTI30 ATS1 LTI65 GASA3 AT1G05510 EM1 GEA6 ATPER1 AT2G47770 CRU3 RAB18 CRA1
macromolecule metabolic process	0.00449034	41.398	19	0.458959	AT5G62800 AT2G24260 UBQ3 AT5G18450 AT2G41710 RAP2.9 AT1G62290 WRKY32 DREB2A PIMT2 OBE2 AT1G75490 SUS3 AT5G22470 BETA-VPE EEL AT5G10120 SOM AT3G54940
cellular protein metabolic process (1.5 %)	0.00458398	18.9434	4	0.211155	AT5G62800 UBQ3 PIMT2 AT5G22470
seed maturation	0.0053707	0.179335	4	22.3046	SUS3 GEA6 ATPER1 M10
lipid localization	0.00606852	1.20815	8	6.62169	AT1G48990 AT5G56100 OLEO4 AT2G25890 OLEO2 AT5G54740 AT3G01570 OLEO1
response to cold	0.0088803	2.48237	11	4.43125	ERD7 LTI78 OLEO4 LTI30 AT2G38905 LTI65 ATGSTF2 AT5G06760 OLEO2 OLEO1 RAB18
anaerobic respiration	0.0133817	0.084948	3	35.3157	AT1G33055 AT1G19530 AT3G10020
protein metabolic process (2.6 %)	0.0253342	21.8505	7	0.320359	AT5G62800 UBQ3 AT1G62290 PIMT2 AT5G22470 BETA-VPE AT3G54940
response to freezing	0.02592	0.103825	3	28.8948	OLEO4 OLEO2 OLEO1
response to organic substance	0.0275014	10.4297	24	2.30112	LBD40 CRU2 DYL1 ATDI19 ATFER2 ATEBP AT1G75490 LTI78 ATDI21 EEL ATHVA22B AHG1 LTI30 ATS1 LTI65 GASA3 AT1G05510 EM1 GEA6 ATPER1 AT2G47770 CRU3 RAB18 CRA1
primary metabolic process	0.0295806	52.3374	30	0.573204	HGO AT5G62800 VTE1 AT3G14360 AT2G32090 AT2G24260 UBQ3 CSR1 AT5G18450 AT2G41710 RAP2.9 AT1G62290 WRKY32 AtGolS2 AT5G55240 DREB2A PIMT2 AT1G75490 PDS1 SUS3 AT5G22470 BETA-VPE AtGolS1 EEL PFK2 AT5G10120 SOM AT2G28420 ATS1 AT3G54940
cellular respiration	0.0311994	0.509688	5	9.80992	ADH1 AT1G33055 SDH2-3 AT1G19530 AT3G10020
anatomical structure development	0.0457214	14.2524	29	2.03475	U2AF35B RTFL8 OBE2 SUS3 AT1G52690 AT5G44310 OLEO4 LEA14 AT3G22490 AT4G36600 AT1G72100 ATS1 AT3G53040 AT2G42560 AT4G21020 ATECP63 AT5G06760 AT1G32560 AT2G35300 ATECP31 EM1 AT3G17520 GEA6 ATPER1 AT3G15670 OLEO2 M10 CRU3 OLEO1
Redundant Subcategories
response to endogenous stimulus	0.00675594	8.28715	22	2.65471	2.65471	LBD40 CRU2 ATDI19 ATFER2 ATEBP LTI78 ATDI21 EEL ATHVA22B AHG1 LTI30 ATS1 LTI65 GASA3 AT1G05510 EM1 GEA6 ATPER1 AT2G47770 CRU3 RAB18 CRA1
fruit development	1.19768e-11	4.38898	27	6.15177	6.15177	OBE2 SUS3 AT1G52690 AT5G44310 OLEO4 LEA14 AT3G22490 AT4G36600 AT1G72100 ATS1 AT3G53040 AT2G42560 AT4G21020 ATECP63 AT5G06760 AT1G32560 AT2G35300 ATECP31 EM1 AT3G17520 GEA6 ATPER1 AT3G15670 OLEO2 M10 CRU3 OLEO1
multicellular organismal process	0.000964728	17.4521	38	2.17739	2.17739	U2AF35B anac060 RTFL8 AT5G62800 CRU2 VEP1 OBE2 anac089 SUS3 ATDI21 AT1G52690 AT5G44310 OLEO4 SOM LEA14 AT3G22490 AT4G36600 AT1G72100 ATS1 AT3G53040 AT2G42560 AT4G21020 ATECP63 AT5G06760 AT1G32560 AT2G35300 ATECP31 EM1 AT3G17520 GEA6 ATPER1 AT3G15670 OLEO2 M10 AT5G54740 CRU3 OLEO1 M17
reproductive developmental process	9.83794e-06	8.62694	28	3.24565	3.24565	U2AF35B OBE2 SUS3 AT1G52690 AT5G44310 OLEO4 LEA14 AT3G22490 AT4G36600 AT1G72100 ATS1 AT3G53040 AT2G42560 AT4G21020 ATECP63 AT5G06760 AT1G32560 AT2G35300 ATECP31 EM1 AT3G17520 GEA6 ATPER1 AT3G15670 OLEO2 M10 CRU3 OLEO1
reproductive process	3.56462e-05	9.18382	28	3.04884	3.04884	U2AF35B OBE2 SUS3 AT1G52690 AT5G44310 OLEO4 LEA14 AT3G22490 AT4G36600 AT1G72100 ATS1 AT3G53040 AT2G42560 AT4G21020 ATECP63 AT5G06760 AT1G32560 AT2G35300 ATECP31 EM1 AT3G17520 GEA6 ATPER1 AT3G15670 OLEO2 M10 CRU3 OLEO1
reproduction	5.16546e-05	9.35372	28	2.99346	2.99346	U2AF35B OBE2 SUS3 AT1G52690 AT5G44310 OLEO4 LEA14 AT3G22490 AT4G36600 AT1G72100 ATS1 AT3G53040 AT2G42560 AT4G21020 ATECP63 AT5G06760 AT1G32560 AT2G35300 ATECP31 EM1 AT3G17520 GEA6 ATPER1 AT3G15670 OLEO2 M10 CRU3 OLEO1
energy derivation by oxidation of organic compounds	0.0311994	0.509688	5	9.80992	9.80992	ADH1 AT1G33055 SDH2-3 AT1G19530 AT3G10020
DOWN-REGULATED GENE SUBSET
subcategory name	p-value	expected number of genes	observed number of genes	Ratio	GeneIDs of test set in subcategory
ribulose-bisphosphate carboxylase activity	0.00694109	0.0626175	3	47.9099	AT5G38430 AT5G38410 AT5G38420
xyloglucan:xyloglucosyl transferase activity	0.00323025	0.140889	4	28.3911	MERI5B XTH9 EXGT-A1 TCH4
chlorophyll binding	0.0173542	0.391359	5	12.776	ELIP1 ELIP2 LHB1B2 NPQ4 LHCB6
water channel activity	0.000692657	0.579212	7	12.0854	TIP2 GAMMA-TIP PIP2;8 NLM1 SIP1A PIP2A PIP2B
response to red light	0.000860784	0.845336	8	9.46369	CYP83B1 CP1 ELIP2 AT5G38430 AT5G38410 AT5G38420 GA3OX2 COL3
cell-cell signaling	0.0212982	0.657484	6	9.1257	HTH RALFL33 RALF1 RALFL24 RALFL22 RALFL34
glutathione transferase activity	0.0460353	0.75141	6	7.98499	ERD9 ATGSTU25 ATGSTU24 ATGSTU27 ATGSTU9 ATGSTU26
cysteine-type peptidase activity	0.000107664	1.45586	11	7.55567	AT5G43060 CP1 RD21 AT1G29090 AT1G29080 AT2G27420 AT3G48340 AT4G11320 AT3G43960 AT1G50670 AT3G19390
photosynthesis, light reaction	0.00949462	1.15842	8	6.90596	LHB1B2 ATPD FED_A PSAL ATPC1 PSAO PSAG PSBO2
photosynthesis	3.0367e-05	1.90983	13	6.80689	LHB1B2 PSAD-1 ATPD FED_A LHCB6 PSAL ATPC1 PSB28 PSAK PSAO LHCB3 PSAG PSBO2
fatty acid biosynthetic process	0.0295025	1.73764	9	5.17944	CER1 LOX1 OPR1 OPR2 PDH-E1_BETA ACP4 KCS8 SAL1 AT5G10160
transferase activity, transferring alkyl or aryl groups	0.0339144	1.76894	9	5.08779	NAS4 MAT3 ERD9 MTO3 ATGSTU25 ATGSTU24 ATGSTU27 ATGSTU9 ATGSTU26
calcium ion binding	0.00759041	2.23858	11	4.91383	AT4G27280 TCH2 AT2G46600 AT2G34020 AT1G09210 CAM2 AT1G62820 AT1G66400 PBP1 ATCP1 CRT1
response to cold	9.55616e-05	4.1171	18	4.37201	ELIP1 KCS19 DIN10 ATPD MTO3 TCH2 AT1G16880 TCH4 KCS20 KCS10 BGLU21 BGLU22 SAL1 SAG21 AT1G62820 AT1G09780 SHM1 ATGSTU26
fatty acid metabolic process	0.0119078	2.78648	12	4.30651	HTH CER1 LOX1 OPR1 KCS10 OPR2 PDH-E1_BETA HCD1 ACP4 KCS8 SAL1 AT5G10160
copper ion binding	0.00657063	3.06826	13	4.23693	MAT3 AT5G15350 ASP1 AT4G23670 SKU5 UCC2 JAL31 AT2G37660 ATGSR1 CYSC1 AT5G21105 PBP1 ATGSR2
sulfur metabolic process	0.0317445	2.61428	11	4.20766	CYP83B1 MAT3 MTO3 CYP79B2 AKN2 SOT16 ACO1 AT1G77330 ATGSTU27 CYSC1 SAL1
generation of precursor metabolites and energy	0.0482828	2.73952	11	4.0153	LHB1B2 ATPD FED_A PSAL ATPC1 SDH2-2 GAPA-2 AT5G56350 PSAO PSAG PSBO2
response to inorganic substance	4.83133e-07	7.63934	29	3.79614	LAC8 AT1G62480 ASP1 AT4G23670 PAP17 TUB7 TCH2 ATOZI1 AT4G13180 NRT1.1 GAD NLM1 DRT112 OPR1 AT1G13930 AT4G34050 ATMDAR2 BCA4 AtPPa6 AT2G17630
response to oxidative stress	0.0406809	3.16218	12	3.79485	AT1G73120 PMSR2 PAP17 TCH2 ATOZI1 AT1G27330 AT1G14870 AT1G09210 TT4 GLYR1 SAG21 CRT1
response to temperature stimulus	0.000102291	6.02693	22	3.65028	AT4G21870 ELIP1 KCS19 HTA11 DIN10 ATPD MTO3 TCH2 AT1G16880 TCH4 CYP71B2 KCS20 KCS10 BGLU21 BGLU22 BIP1 SAL1 SAG21 AT1G62820 AT1G09780 SHM1 ATGSTU26
response to cadmium ion	0.00218169	5.11898	18	3.51633	AT1G62480 ASP1 AT4G23670 TUB7 GAD OPR1 AT1G13930 AT4G34050 ATMDAR2 AtPPa6 AT2G17630 AT1G09780 SHM1 PBD2 AT3G60750 APS1 CRT1 SHM4
carboxylesterase activity	0.0275946	4.02317	14	3.47984	AT3G16370 AT5G45950 AT1G28660 ARAB-1 AT1G54000 LTL1 AT1G54010 AT3G48460 AT5G45670 AT4G18970 ATPME3 AT1G29670 AT1G54030 AT3G49220
response to light stimulus	2.24561e-05	7.49845	26	3.46738	CYP83B1 KCS19 CP1 ELIP2 AT5G38430 AT5G38410 EXGT-A1 AT5G38420 GA3OX2 FED_A TCH2 NPQ4 LHCB6 SBH2 DRT112 KCS20 RPT2 KCS10 DRT100 ACP4 TT4 SAL1 STO COL3 PSBO2 TUB1
peptidase activity, acting on L-amino acid peptides	0.0367867	4.13276	14	3.38757	AT5G43060 CP1 RD21 AT1G29090 AT1G29080 SCPL9 AT2G27420 scpl44 scpl25 AT3G48340 AT4G11320 AT3G43960 AT1G50670 AT3G19390
carboxylic acid biosynthetic process	0.0121774	4.74328	16	3.37319	CYP83B1 MAT3 MTO3 CYP79B2 CER1 GA3OX2 LOX1 OPR1 OPR2 PDH-E1_BETA CYSC1 ACP4 KCS8 SAL1 AT5G10160 AT1G22410
response to metal ion	0.000785489	6.2774	21	3.34533	LAC8 AT1G62480 ASP1 AT4G23670 TUB7 TCH2 GAD DRT112 OPR1 AT1G13930 AT4G34050 ATMDAR2 AtPPa6 AT2G17630 AT1G09780 SHM1 PBD2 AT3G60750 APS1 CRT1 SHM4
hydrolase activity, acting on glycosyl bonds	0.000955118	6.35568	21	3.30413	XTH18 BXL2 AT4G01700 BXL1 AT3G23730 MERI5B XTH9 AT1G56680 DIN10 EXGT-A1 XTR7 ATGH9B1 TCH4 XYL4 BGLU21 BGLU22 ATBETAFRUCT4 HEXO3 AT1G78060 XTR6 AT3G07320
monocarboxylic acid metabolic process	0.0234356	5.0094	16	3.194	NAS4 CYP83B1 HTH CYP79B2 CER1 GA3OX2 LOX1 OPR1 KCS10 OPR2 PDH-E1_BETA HCD1 ACP4 KCS8 SAL1 AT5G10160
response to salt stress	0.0222278	6.08955	18	2.95588	AT5G43060 AT1G14210 AT1G62480 AT4G23670 TUB7 AT1G13930 ATMDAR2 BGLU21 BGLU22 AT1G09210 AtPPa6 SAL1 STO AT3G60750 COB ATCP1 ATGSR2 CRT1
small molecule biosynthetic process	0.000406967	9.28304	27	2.90853	NAS4 CYP83B1 ATOMT1 MAT3 MTO3 CYP79B2 CER1 GA3OX2 ACO1 ATPC1 LOX1 OPR1 AT1G77330 OPR2 PDH-E1_BETA PRR2 AT4G34050 AT1G55210 CYSC1 NRS/ER MUR1 ACP4 TT4 KCS8 SAL1 AT5G10160 AT1G22410
secondary metabolic process	0.047483	5.88605	17	2.88818	CYP83B1 ATOMT1 ERD9 MTO3 CYP79B2 AKN2 SOT16 ATGSTU25 GA3OX2 ATGSTU24 ATGSTU27 PRR2 AT4G34050 ATGSTU9 AT1G55210 TT4 ATGSTU26
oxidoreductase activity	6.41721e-06	14.1829	39	2.74979	LAC8 AT5G39580 CYP83B1 AT1G06360 AT5G64100 TSO2 PMSR2 GER1 GA3OX2 PORB AT5G05370 ACO1 AT4G13180 SBH2 AT3G29360 FRO3 LOX1 SDH2-2 OPR1 AT1G77330 OPR2 PDH-E1_BETA AT1G32470 PRR2 ATMDAR2 AT5G39320 GAPA-2 NRS/ER AT2G18980 NDB3 MIOX2 GLYR1 AT2G47140 AT5G64120 PSBO2 AT1G14540 AT5G21105 AT3G14415 CRD1
cellular ketone metabolic process	0.00202912	9.51786	26	2.73171	NAS4 CYP83B1 MAT3 HTH MTO3 CYP79B2 CER1 GA3OX2 ACO1 LOX1 OPR1 AT1G77330 KCS10 OPR2 PDH-E1_BETA AT1G32470 CYSC1 HCD1 ACP4 TT4 KCS8 SAL1 AT5G10160 AT1G22410 SHM1 SHM4
carboxylic acid metabolic process	0.00443861	9.34566	25	2.67504	NAS4 CYP83B1 MAT3 HTH MTO3 CYP79B2 CER1 GA3OX2 ACO1 LOX1 OPR1 AT1G77330 KCS10 OPR2 PDH-E1_BETA AT1G32470 CYSC1 HCD1 ACP4 KCS8 SAL1 AT5G10160 AT1G22410 SHM1 SHM4
macromolecule biosynthetic process	0.0225015	40.9362	19	0.464137	TSO2 BHLH039 BHLH038 BHLH100 AT5G67510 AT5G48890 PCNA2 DRT112 HEC2 AT3G55750 PCNA1 AT1G77750 SAL1 LIL3:1 AT2G43140 HEC1 AT3G10610 AT1G07070 AT1G51070
gene expression	0.0070101	44.161	20	0.452888	AT2G35384 BHLH039 BHLH038 BHLH100 AT5G67510 AT5G48890 DRT112 HEC2 AT3G55750 MIR163 AT1G77750 SAL1 LIL3:1 PSAG AT5G13225 AT2G43140 HEC1 AT3G10610 AT1G07070 AT1G51070
cellular macromolecule metabolic process	8.82566e-05	61.8348	28	0.452819	TSO2 PMSR2 AT2G35384 BHLH039 BHLH038 BHLH100 AT5G67510 AT5G48890 AT3G46940 PCNA2 DRT112 HEC2 AT3G55750 PCNA1 BIP1 AT1G77750 SAL1 LIL3:1 PSBO2 PBP1 PBD2 AT5G13225 AT2G43140 ATERDJ3B HEC1 AT3G10610 AT1G07070 AT1G51070
cellular protein metabolic process	0.0172463	31.4183	12	0.381943	PMSR2 AT5G67510 DRT112 AT3G55750 BIP1 AT1G77750 PSBO2 PBP1 PBD2 ATERDJ3B AT3G10610 AT1G07070
RNA metabolic process	0.0183865	16.6249	3	0.180452	AT2G35384 SAL1 AT5G13225
transferase activity, transferring phosphorus-containing groups	0.000109617	22.2918	3	0.134579	AKN2 AT5G56350 APS1
GO Cellular components
anchored to plasma membrane	0.0354826	1.03319	7	6.77513	FLA9 AT5G15350 FLA2 SKU5 UCC2 FLA7 COB
anchored to membrane	0.000932594	3.86663	16	4.13797	AGP12 AGP21 FLA9 AT3G43720 AGP4 AT5G15350 FLA2 AGP15 SKU5 UCC2 AGP18 FLA7 AGP7 AT1G23040 AT3G43960 COB
photosystem	3.30984e-09	0.579212	11	18.9913	PSBQA PSAD-1 LHCB6 PSBTN PSAL PSB28 PSAK PSAO PSAG PSBO2 PSAE-1
photosystem I	2.90503e-05	0.234816	6	25.5519	PSAD-1 PSAL PSAK PSAO PSAG PSAE-1
photosystem II	0.00894077	0.344396	5	14.5182	PSBQA LHCB6 PSBTN PSB28 PSBO2
membrane part	8.63342e-05	11.9913	33	2.752	AGP12 AGP21 FLA9 AT3G43720 AGP4 PSBQA PSAD-1 AT5G15350 FLA2 AGP15 AT1G64090 SKU5 NPQ4 AT5G05370 LHCB6 PSBTN PSAL UCC2 ATPC1 SDH2-2 AGP18 PSB28 PSAK FLA7 AGP7 STP4 AT1G23040 AT3G43960 PSAO PSAG PSBO2 PSAE-1 COB
ribulose bisphosphate carboxylase complex	0.00694109	0.0626175	3	47.9099	AT5G38430 AT5G38410 AT5G38420
chloroplast ribulose bisphosphate carboxylase complex	0.00694109	0.0626175	3	47.9099	AT5G38430 AT5G38410 AT5G38420
plastoglobule	0.0152505	0.907954	7	7.70964	LHB1B2 PSAD-1 ATPD LHCB6 PSAL PSBO2 PSAE-1
thylakoid	2.90696e-12	6.59049	34	5.15895	AT2G45180 AT2G22170 PSBQA LHB1B2 AT5G38430 PSAD-1 AT2G10940 ATPD AT5G38410 AT5G38420 AT1G68590 PORB NPQ4 AT1G16880 AT5G08050 LHCB6 PSBTN PSAL AT1G52220 ATPC1 DRT112 PSB28 PSAK AT2G37660 AT5G04740 AtPPa6 LIL3:1 PSAO AT3G49720 LHCB3 PSAG PSBO2 PSAE-1 CRD1
thylakoid membrane	9.87752e-10	4.69631	26	5.53626	AT2G45180 PSBQA LHB1B2 PSAD-1 AT2G10940 ATPD AT1G68590 PORB NPQ4 AT1G16880 AT5G08050 LHCB6 PSBTN PSAL AT1G52220 ATPC1 PSB28 PSAK AT5G04740 LIL3:1 AT3G49720 LHCB3 PSAG PSBO2 PSAE-1 CRD1
thylakoid part	5.14485e-10	5.33814	28	5.24527	AT2G45180 PSBQA LHB1B2 PSAD-1 AT2G10940 ATPD AT1G68590 PORB NPQ4 AT1G16880 AT5G08050 LHCB6 PSBTN PSAL AT1G52220 ATPC1 DRT112 PSB28 PSAK AT5G04740 LIL3:1 PSAO AT3G49720 LHCB3 PSAG PSBO2 PSAE-1 CRD1
photosynthetic membrane	1.75579e-10	4.72762	27	5.71112	AT2G45180 PSBQA LHB1B2 PSAD-1 AT2G10940 ATPD AT1G68590 PORB NPQ4 AT1G16880 AT5G08050 LHCB6 PSBTN PSAL AT1G52220 ATPC1 PSB28 PSAK AT5G04740 LIL3:1 PSAO AT3G49720 LHCB3 PSAG PSBO2 PSAE-1 CRD1
chloroplast stroma	4.04402e-05	6.19913	23	3.7102	PSBQA AT5G38430 AT5G38410 AT5G38420 FED_A ATFD1 CHLI2 AT1G16880 DRT112 PSB28 AT1G13930 AT2G37660 CHLI1 GAPA-2 AT5G04740 ACP4 AtPPa6 SAL1 PSBO2 AT2G33180 AT3G60750 APS1 AT3G14415
chloroplast envelope	0.0317326	6.84096	19	2.77739	AT5G38430 ATPD GAMMA-TIP AT5G38420 PORB AT1G16880 LHCB6 PSAL ATPC1 PDH-E1_BETA AT1G13930 GAPA-2 ACP4 BCA4 AtPPa6 PSAG AT3G60750 ATGSR2 CRD1
chloroplast thylakoid	3.29207e-09	5.3538	27	5.04315	AT2G45180 PSBQA LHB1B2 PSAD-1 AT2G10940 ATPD AT1G68590 PORB NPQ4 AT1G16880 AT5G08050 LHCB6 PSBTN PSAL AT1G52220 ATPC1 DRT112 PSB28 PSAK AT5G04740 LIL3:1 AT3G49720 LHCB3 PSAG PSBO2 PSAE-1 CRD1
chloroplast thylakoid membrane	3.86652e-10	4.50846	26	5.76694	AT2G45180 PSBQA LHB1B2 PSAD-1 AT2G10940 ATPD AT1G68590 PORB NPQ4 AT1G16880 AT5G08050 LHCB6 PSBTN PSAL AT1G52220 ATPC1 PSB28 PSAK AT5G04740 LIL3:1 AT3G49720 LHCB3 PSAG PSBO2 PSAE-1 CRD1
plastid envelope	0.0193369	7.1697	20	2.78952	AT5G38430 ATPD GAMMA-TIP AT5G38420 PORB AT1G16880 LHCB6 PSAL ATPC1 PDH-E1_BETA AT1G13930 GAPA-2 ACP4 BCA4 AtPPa6 PSAG SHM1 AT3G60750 ATGSR2 CRD1
plastid stroma	9.3358e-05	6.49657	23	3.54033	PSBQA AT5G38430 AT5G38410 AT5G38420 FED_A ATFD1 CHLI2 AT1G16880 DRT112 PSB28 AT1G13930 AT2G37660 CHLI1 GAPA-2 AT5G04740 ACP4 AtPPa6 SAL1 PSBO2 AT2G33180 AT3G60750 APS1 AT3G14415
plastid thylakoid	3.29207e-09	5.3538	27	5.04315	AT2G45180 PSBQA LHB1B2 PSAD-1 AT2G10940 ATPD AT1G68590 PORB NPQ4 AT1G16880 AT5G08050 LHCB6 PSBTN PSAL AT1G52220 ATPC1 DRT112 PSB28 PSAK AT5G04740 LIL3:1 AT3G49720 LHCB3 PSAG PSBO2 PSAE-1 CRD1
plastid thylakoid membrane	3.86652e-10	4.50846	26	5.76694	AT2G45180 PSBQA LHB1B2 PSAD-1 AT2G10940 ATPD AT1G68590 PORB NPQ4 AT1G16880 AT5G08050 LHCB6 PSBTN PSAL AT1G52220 ATPC1 PSB28 PSAK AT5G04740 LIL3:1 AT3G49720 LHCB3 PSAG PSBO2 PSAE-1 CRD1
apoplast	8.61056e-15	4.08579	30	7.34252	BXL1 AT1G09310 AT3G16370 AT5G38430 AT2G10940 RD21 AT5G38410 sks5 AT5G38420 SKU5 ATPME3 RALFL33 AT1G78820 CAD9 RALF1 XYL4 RALFL24 RALFL22 AT2G37660 RALFL34 AT3G15356 GAPA-2 AT1G29670 AT3G20820 AT5G64120 AT1G78060 AT1G17860 SHM1 AT3G14415 ATGSR2
extracellular region	1.80927e-15	5.16594	34	6.58157	BXL1 AT1G09310 AT3G16370 TIP2 AT5G38430 AT2G10940 RD21 AT5G38410 HTH EXGT-A1 sks5 GER1 AT5G38420 SKU5 ATPME3 RALFL33 AT1G78820 CAD9 RALF1 XYL4 RALFL24 RALFL22 AT2G37660 RALFL34 AT3G15356 GAPA-2 AT1G29670 AT3G20820 AT5G64120 AT1G78060 AT1G17860 SHM1 AT3G14415 ATGSR2
plant-type cell wall	2.62171e-10	4.07014	25	6.14229	BXL2 EXO BXL1 MERI5B AT1G54000 EXL3 EXGT-A1 sks5 SKU5 GASA1 RALFL33 AT5G61790 sks4 sks17 AT4G32460 PHI-1 AT2G05920 AT1G53070 ATBETAFRUCT4 HEXO3
endoplasmic reticulum	0.0476715	5.32249	16	3.00611	CYP83B1 TIP2 AT1G64090 AT5G61790 ATSAR1B SBH2 KCS10 SIP1A AT1G09210 BIP1 AT1G54030 TT4 KCS8 AT1G61790 ATERDJ3B CRT1
organelle subcompartment	3.76852e-09	5.38511	27	5.01383	AT2G45180 PSBQA LHB1B2 PSAD-1 AT2G10940 ATPD AT1G68590 PORB NPQ4 AT1G16880 AT5G08050 LHCB6 PSBTN PSAL AT1G52220 ATPC1 DRT112 PSB28 PSAK AT5G04740 LIL3:1 AT3G49720 LHCB3 PSAG PSBO2 PSAE-1 CRD1
vacuole	5.01374e-06	9.00127	30	3.33286	AT5G43060 TIP2 AT1G54000 AT1G54010 AT5G23820 RD21 SUC1 AT5G15350 AT4G23670 SAHH2 GAMMA-TIP TUB7 AT3G07470 AT5G61790 GRF2 AT5G44020 BGLU21 PIP2A AT1G09210 BIP1 ATBETAFRUCT4 VAG2 AT1G54030 TT4 AT3G07460 PBD2 AT3G14415 ATGSR2 TUB1 AtRABA1c
Redundant Subcategories
response to radiation	4.29368e-05	7.74892	26	3.35531	CYP83B1 KCS19 CP1 ELIP2 AT5G38430 AT5G38410 EXGT-A1 AT5G38420 GA3OX2 FED_A TCH2 NPQ4 LHCB6 SBH2 DRT112 KCS20 RPT2 KCS10 DRT100 ACP4 TT4 SAL1 STO COL3 PSBO2 TUB1
organic acid biosynthetic process	0.0121774	4.74328	16	3.37319	CYP83B1 MAT3 MTO3 CYP79B2 CER1 GA3OX2 LOX1 OPR1 OPR2 PDH-E1_BETA CYSC1 ACP4 KCS8 SAL1 AT5G10160 AT1G22410
toxin catabolic process	0.0360765	0.720101	6	8.33216	ERD9 ATGSTU25 ATGSTU24 ATGSTU27 ATGSTU9 ATGSTU26
toxin metabolic process	0.0360765	0.720101	6	8.33216	ERD9 ATGSTU25 ATGSTU24 ATGSTU27 ATGSTU9 ATGSTU26
organic acid metabolic process	0.00456651	9.36132	25	2.67056	NAS4 CYP83B1 MAT3 HTH MTO3 CYP79B2 CER1 GA3OX2 ACO1 LOX1 OPR1 AT1G77330 KCS10 OPR2 PDH-E1_BETA AT1G32470 CYSC1 HCD1 ACP4 KCS8 SAL1 AT5G10160 AT1G22410 SHM1 SHM4
oxoacid metabolic process	0.00443861	9.34566	25	2.67504	NAS4 CYP83B1 MAT3 HTH MTO3 CYP79B2 CER1 GA3OX2 ACO1 LOX1 OPR1 AT1G77330 KCS10 OPR2 PDH-E1_BETA AT1G32470 CYSC1 HCD1 ACP4 KCS8 SAL1 AT5G10160 AT1G22410 SHM1 SHM4
water transmembrane transporter activity	0.000692657	0.579212	7	12.0854	TIP2 GAMMA-TIP PIP2;8 NLM1 SIP1A PIP2A PIP2B
cellular macromolecule biosynthetic process	0.0270527	40.6388	19	0.467533	TSO2 BHLH039 BHLH038 BHLH100 AT5G67510 AT5G48890 PCNA2 DRT112 HEC2 AT3G55750 PCNA1 AT1G77750 SAL1 LIL3:1 AT2G43140 HEC1 AT3G10610 AT1G07070 AT1G51070
