# Supplementary material for: The Re-Establishment of Desiccation Tolerance in Germinated Arabidopsis thaliana Seeds and Its Associated Transcriptome
Source: PLoS One. 2011 Dec 14;6(12):e29123. doi: 10.1371/journal.pone.0029123 (PMC3237594; doi:10.1371/journal.pone.0029123)
Supplement: Table S3 — Comparison between the Arabidopsis gene list for expression after re-establishment of desiccation tolerance (DT/DS gene set - Table S1) against a data set obtained in a similar system for Medicago [10] . (XLS) [file pone.0029123.s004.xls]

## Sheet: Sheet1
Source	Medicago ID	D_Source	Comment_Source	Target	Arabidopsis ID	D_Target	Comment_Target	Software	Expression status in M. truncatula (Buitink et al. 2006 - table S1)	Expression status in A. thaliana (This article Table S1)
MtGI7	TC77776	MTGI7-TC77776	L-ascorbate oxDase pm=	TAIR9_pep	AT5G21105	AT5G21105.1	L-ascorbate oxDase/ copper ion binding / oxDoreductase	blastx	Down	Down
MtGI7	TC78764	MTGI7-TC78764	similar to PIR|C96802|C96802 hypothetical protein F2P24.4 [imported] - ArabDopsis thaliana, partial (88%) pm=	TAIR9_pep	AT1G77330	AT1G77330.1	1-aminocyclopropane-1-carboxylate oxDase, putative / ACC oxDase, putative	blastx	Down	Down
MtGI7	TC85963	MTGI7-TC85963	similar to PIR|T09593|T09593 CIC protein cold-inducible - alfalfa, partial (80%) pm=	TAIR9_pep	AT2G45180	AT2G45180.1	protease inhibitor/seed storage/lipD transfer protein (LTP) family protein	blastx	Down	Down
MtGI7	TC86537	MTGI7-TC86537	similar to GP|13377778|gb|AAK20858.1 fasciclin-like arabinogalactan-protein 2 {ArabDopsis thaliana}, partial (57%) pm=	TAIR9_pep	AT4G12730	AT4G12730.1	FLA2 (FASCICLIN-LIKE ARABINOGALACTAN 2)	blastx	Down	Down
MtGI7	TC85405	MTGI7-TC85405	SP|Q39445|TBB_CICAR Tubulin beta chain. [Chickpea Garbanzo] {Cicer arietinum}, partial (98%) pm=	TAIR9_pep	AT1G75780	AT1G75780.1	TUB1 GTP binding / GTPase/ structural molecule	blastx	Down	Down
MtGI7	TC89089	MTGI7-TC89089	homologue to SP|P43282|METM_LYCES S-adenosylmethionine synthetase 3 (EC 2.5.1.6) (Methionine adenosyltransferase 3), partial (72%) pm=	TAIR9_pep	AT2G36880	AT2G36880.2	MAT3 (methionine adenosyltransferase 3) methionine adenosyltransferase	blastx	Down	Down
MtGI7	TC77216	MTGI7-TC77216	similar to PIR|G85040|G85040 probable xyloglucan endotransglycosylase [imported] - ArabDopsis thaliana, partial (86%) pm=	TAIR9_pep	AT4G03210	AT4G03210.1	XTH9 (XYLOGLUCAN ENDOTRANSGLUCOSYLASE/HYDROLASE 9) hydrolase, acting on glycosyl bonds / xyloglucan:xyloglucosyl transferase	blastx	Down	Down
MtGI7	TC79849	MTGI7-TC79849	similar to GP|16648847|gb|AAL25613.1 AT5g44130/MLN1_5 {ArabDopsis thaliana}, partial (50%) pm=	TAIR9_pep	AT1G03870	AT1G03870.1	FLA9 (FASCICLIN-LIKE ARABINOOGALACTAN 9)	blastx	Down	Down
MtGI7	TC86426	MTGI7-TC86426	similar to PIR|T07634|T07634 pollen-specific protein homolog T1P17.10 - ArabDopsis thaliana, partial (91%) pm=	TAIR9_pep	AT4G12420	AT4G12420.1	SKU5 copper ion binding / oxDoreductase	blastx	Down	Down
MtGI7	TC77710	MTGI7-TC77710	weakly similar to GP|13377782|gb|AAK20860.1 fasciclin-like arabinogalactan-protein 7 {ArabDopsis thaliana}, partial (71%) pm=	TAIR9_pep	AT2G04780	AT2G04780.2	FLA7 (FASCICLIN-LIKE ARABINOOGALACTAN 7)	blastx	Down	Down
MtGI7	TC87856	MTGI7-TC87856	similar to GP|19699067|gb|AAL90901.1 AT5g20250/F5O24_140 {ArabDopsis thaliana}, partial (45%) pm=	TAIR9_pep	AT5G20250	AT5G20250.3	DIN10 (DARK INDUCIBLE 10) hydrolase, hydrolyzing O-glycosyl compounds	blastx	Down	Down
MtGI7	TC85697	MTGI7-TC85697	homologue to SP|P53496|ACTB_ARATH Actin 11. [Mouse-ear cress] {ArabDopsis thaliana}, complete pm=	TAIR9_pep	AT3G12110	AT3G12110.1	ACT11 (actin-11) structural constituent of cytoskeleton	blastx	Down	Down
MtGI7	TC76597	MTGI7-TC76597	similar to GP|9759419|dbj|BAB09906.1 xylosDase {ArabDopsis thaliana}, partial (77%) pm=	TAIR9_pep	AT5G49360	AT5G49360.1	BXL1 (BETA-XYLOSDASE 1) hydrolase, hydrolyzing O-glycosyl compounds	blastx	Down	Down
MtGI7	TC79833	MTGI7-TC79833	similar to PIR|S56678|S56678 aspartate transaminase (EC 2.6.1.1) precursor - soybean, partial (66%) pm=	TAIR9_pep	AT2G30970	AT2G30970.2	ASP1 (ASPARTATE AMINOTRANSFERASE 1) L-aspartate:2-oxoglutarate aminotransferase	blastx	Down	Down
MtGI7	TC86888	MTGI7-TC86888	similar to PIR|S71274|S71274 blue copper-binding protein 15K - ArabDopsis thaliana, partial (14%) pm=	TAIR9_pep	AT5G15350	AT5G15350.1	plastocyanin-like domain-containing protein	blastx	Down	Down
MtGI7	TC87441	MTGI7-TC87441	similar to GP|21928031|gb|AAM78044.1 At3g62600/F26K9_30 {ArabDopsis thaliana}, partial (94%) pm=	TAIR9_pep	AT3G62600	AT3G62600.1	ATERDJ3B heat shock protein binding / unfolded protein binding	blastx	Down	Down
MtGI7	TC83832	MTGI7-TC83832	similar to GP|5042435|gb|AAD38274.1| Unknown protein {ArabDopsis thaliana}, partial (9%) pm=	TAIR9_pep	AT1G64980	AT1G64980.1	unknown protein	blastx	Down	Down
MtGI7	TC85194	MTGI7-TC85194	similar to PIR|S56655|S56655 lipoxygenase (EC 1.13.11.12) loxG - garden pea, partial (14%) pm=	TAIR9_pep	AT1G55020	AT1G55020.1	LOX1 lipoxygenase	blastx	Down	Down
MtGI7	TC76787	MTGI7-TC76787	homologue to PIR|B71400|B71400 glycine hydroxymethyltransferase (EC 2.1.2.1) - ArabDopsis thaliana, complete pm=	TAIR9_pep	AT4G13930	AT4G13930.1	SHM4 (serine hydroxymethyltransferase 4) catalytic/ glycine hydroxymethyltransferase/ pyrDoxal phosphate binding	blastx	Down	Down
MtGI7	TC90354	MTGI7-TC90354	similar to GP|9294651|dbj|BAB03000.1 nucleotDe sugar epimerase-like protein {ArabDopsis thaliana}, partial (55%) pm=	TAIR9_pep	AT3G23820	AT3G23820.1	GAE6 (UDP-D-GLUCURONATE 4-EPIMERASE 6) UDP-glucuronate 4-epimerase/ catalytic	blastx	Down	Down
MtGI7	TC87425	MTGI7-TC87425	weakly similar to GP|20161478|dbj|BAB90402. contains ESTs C74501(E31745) AU094804(E31745)~unknown protein, partial (24%) pm=	TAIR9_pep	AT3G43720	AT3G43720.2	protease inhibitor/seed storage/lipD transfer protein (LTP) family protein	blastx	Down	Down
MtGI7	TC85808	MTGI7-TC85808	similar to GP|6143903|gb|AAF04449.1| 12-oxophytodienoate reductase (OPR2) 15748-17127 {ArabDopsis thaliana}, partial (95%) pm=	TAIR9_pep	AT1G76690	AT1G76690.1	OPR2	blastx	Down	Down
MtGI7	TC78285	MTGI7-TC78285	similar to PIR|A84473|A84473 probable serine proteinase [imported] - ArabDopsis thaliana, partial (41%) pm=	TAIR9_pep	AT2G05920	AT2G05920.1	subtilase family protein	blastx	Down	Down
MtGI7	TC77921	MTGI7-TC77921	similar to GP|21553837|gb|AAM62930.1 phytochelatin synthetase-like protein {ArabDopsis thaliana}, partial (82%) pm=	TAIR9_pep	AT5G60920	AT5G60920.1	COB (COBRA)	blastx	Down	Down
MtGI7	TC89122	MTGI7-TC89122	similar to GP|22136922|gb|AAM91805.1 unknown protein {ArabDopsis thaliana}, partial (46%) pm=	TAIR9_pep	AT5G67070	AT5G67070.1	RALFL34 (ralf-like 34) signal transducer	blastx	Down	Down
MtGI7	TC80261	MTGI7-TC80261	similar to PIR|T49108|T49108 pectinesterase like protein - ArabDopsis thaliana, partial (64%) pm=	TAIR9_pep	AT4G22010	AT4G22010.1	sks4 (SKU5 Similar 4) copper ion binding / oxDoreductase	blastx	Down	Down
MtGI7	TC86464	MTGI7-TC86464	similar to GP|2098711|gb|AAB57670.1| pectinesterase {Citrus sinensis}, partial (85%) pm=	TAIR9_pep	AT3G14310	AT3G14310.1	ATPME3 pectinesterase	blastx	Down	Down
MtGI7	TC87177	MTGI7-TC87177	weakly similar to GP|4530585|gb|AAD22104.1| B12D protein {Ipomoea batatas}, partial (96%) pm=	TAIR9_pep	AT3G48140	AT3G48140.1	senescence-associated protein, putative	blastx	Down	Down
MtGI7	TC88477	MTGI7-TC88477	similar to GP|21592417|gb|AAM64368.1 lipase/hydrolase putative {ArabDopsis thaliana}, partial (92%) pm=	TAIR9_pep	AT1G29670	AT1G29670.1	GDSL-motif lipase/hydrolase family protein	blastx	Down	Down
MtGI7	TC77275	MTGI7-TC77275	similar to SP|Q42954|KPYC_TOBAC Pyruvate kinase cytosolic isozyme (EC 2.7.1.40). [Common tobacco] {Nicotiana tabacum}, partial (97%) pm=	TAIR9_pep	AT5G56350	AT5G56350.1	pyruvate kinase, putative	blastx	Down	Down
MtGI7	TC85391	MTGI7-TC85391	homologue to PIR|T06598|T06598 dnaK-type molecular chaperone BiP-A - soybean, partial (52%) pm=	TAIR9_pep	AT5G28540	AT5G28540.1	BIP1 ATP binding	blastx	Down	Down
MtGI7	TC80503	MTGI7-TC80503	similar to GP|20977547|gb|AAK94674.1 ribosomal protein S13 {Glycine max}, partial (90%) pm=	TAIR9_pep	AT1G77750	AT1G77750.1	30S ribosomal protein S13, chloroplast, putative	blastx	Down	Down
MtGI7	TC76876	MTGI7-TC76876	similar to GP|20453070|gb|AAM19780.1 AT5g66920/MUD21_18 {ArabDopsis thaliana}, partial (86%) pm=	TAIR9_pep	AT5G66920	AT5G66920.1	sks17 (SKU5 Similar 17) copper ion binding / oxDoreductase	blastx	Down	Down
MtGI7	TC76618	MTGI7-TC76618	homologue to SP|O22582|H2B_GOSHI Histone H2B. [Upland cotton] {Gossypium hirsutum}, complete pm=	TAIR9_pep	AT1G07790	AT1G07790.1	HTB1 DNA binding	blastx	Down	Down
MtGI7	TC91027	MTGI7-TC91027	similar to GP|14517502|gb|AAK62641.1 At2g38310/T19C21.20 {ArabDopsis thaliana}, partial (55%) pm=	TAIR9_pep	AT2G38310	AT2G38310.1	unknown protein	blastx	Down	Down
MtGI7	TC87454	MTGI7-TC87454	similar to SP|P49730|RIR2_TOBAC RibonucleosDe-diphosphate reductase small chain (EC 1.17.4.1) (RibonucleotDe reductase), partial (96%) pm=	TAIR9_pep	AT3G27060	AT3G27060.1	TSO2 (TSO meaning 'ugly' in Chinese) oxDoreductase/ ribonucleosDe-diphosphate reductase/ transition metal ion binding	blastx	Down	Down
MtGI7	TC86072	MTGI7-TC86072	similar to GP|11559260|dbj|BAB18760. beta-cyanoalanine synthase {Solanum tuberosum}, partial (96%) pm=	TAIR9_pep	AT3G61440	AT3G61440.1	CYSC1 (CYSTEINE SYNTHASE C1) L-3-cyanoalanine synthase/ cysteine synthase	blastx	Down	Down
MtGI7	TC77861	MTGI7-TC77861	weakly similar to GP|13899081|gb|AAK48962.1 Unknown protein {ArabDopsis thaliana}, partial (39%) pm=	TAIR9_pep	AT1G17860	AT1G17860.1	trypsin and protease inhibitor family protein / Kunitz family protein	blastx	Down	Down
MtGI7	TC85328	MTGI7-TC85328	similar to GP|21439796|emb|CAD35171. unnamed protein product {Glycine max}, complete pm=	TAIR9_pep	AT1G75750	AT1G75750.1	GASA1 (GAST1 PROTEIN HOMOLOG 1)	blastx	Down	Down
MtGI7	TC77314	MTGI7-TC77314	similar to GP|1255951|emb|CAA65634.1 PS60 {Nicotiana tabacum}, partial (95%) pm=	TAIR9_pep	AT1G76160	AT1G76160.1	sks5 (SKU5 Similar 5) copper ion binding / oxDoreductase	blastx	Down	Down
MtGI7	TC87390	MTGI7-TC87390	similar to GP|20197290|gb|AAC62136.2 expressed protein {ArabDopsis thaliana}, partial (92%) pm=	TAIR9_pep	AT2G19800	AT2G19800.1	MIOX2 (MYO-INOSITOL OXYGENASE 2) inositol oxygenase	blastx	Down	Down
MtGI7	TC92777	MTGI7-TC92777	weakly similar to PIR|T49928|T49928 beta-glucosDase-like protein - ArabDopsis thaliana, partial (17%) pm=	TAIR9_pep	AT5G64570	AT5G64570.1	XYL4 hydrolase, hydrolyzing O-glycosyl compounds / xylan 1,4-beta-xylosDase	blastx	Down	Down
MtGI7	TC87875	MTGI7-TC87875	similar to GP|8745402|gb|AAF78903.1| proline-rich protein {Glycine max}, partial (80%) pm=	TAIR9_pep	AT1G12090	AT1G12090.1	ELP (EXTENSIN-LIKE PROTEIN) lipD binding	blastx	Down	Down
MtGI7	TC88937	MTGI7-TC88937	homologue to SP|Q43857|INVA_VICFA AcD beta-fructofuranosDase precursor (EC 3.2.1.26) (AcD sucrose-6- phosphate hydrolase), partial (42%) pm=	TAIR9_pep	AT1G12240	AT1G12240.1	ATBETAFRUCT4 beta-fructofuranosDase/ hydrolase, hydrolyzing O-glycosyl compounds	blastx	Down	Down
MtGI7	TC77047	MTGI7-TC77047	weakly similar to GP|18252925|gb|AAL62389.1 unknown protein {ArabDopsis thaliana}, partial (76%) pm=	TAIR9_pep	AT1G14870	AT1G14870.1	FUNCTIONS IN molecular_function unknown INVOLVED IN response to oxDative stress LOCATED IN plasma membrane EXPRESSED IN callus CONTAINS InterPro DOMAIN/s EGF-type aspartate/asparagine hydroxylation conserved site (InterPro:IPR000152), Protein of unknown	blastx	Down	Down
MtGI7	TC88255	MTGI7-TC88255	similar to SP|Q00874|D100_ARATH DNA-damage-repair/toleration protein DRT100 precursor. [Mouse-ear cress] {ArabDopsis thaliana}, partial (22%) pm=	TAIR9_pep	AT3G12610	AT3G12610.1	DRT100 (DNA-DAMAGE REPAIR/TOLERATION 100) nucleotDe binding / protein binding	blastx	Down	Down
MtGI7	TC77273	MTGI7-TC77273	PIR|A26014|A26014 histone H3 - wheat, complete pm=	TAIR9_pep	AT5G65360	AT5G65360.1	histone H3	blastx	Down	Down
MtGI7	TC76324	MTGI7-TC76324	similar to GP|7242813|emb|CAB77393.1 germin-like protein {Phaseolus vulgaris}, partial (93%) pm=	TAIR9_pep	AT1G72610	AT1G72610.1	GER1 (GERMIN-LIKE PROTEIN 1) oxalate oxDase	blastx	Down	Down
MtGI7	TC87576	MTGI7-TC87576	similar to GP|20160776|dbj|BAB89717. photosystem II protein W-like protein {Oryza sativa (japonica cultivar-group)}, complete pm=	TAIR9_pep	AT4G28660	AT4G28660.1	PSB28 (PHOTOSYSTEM II REACTION CENTER PSB28 PROTEIN)	blastx	Down	Down
MtGI7	TC76770	MTGI7-TC76770	GP|22218878|pdb|1JWX|A Chain A Chalcone Synthase--F215s Mutant, partial (34%) pm=	TAIR9_pep	AT5G13930	AT5G13930.1	TT4 (TRANSPARENT TESTA 4) naringenin-chalcone synthase	blastx	Up	Down
MtGI7	TC88282	MTGI7-TC88282	similar to PIR|T48248|T48248 ABC transporter-like protein - ArabDopsis thaliana, partial (95%) pm=	TAIR9_pep	AT5G02270	AT5G02270.1	ATNAP9 transporter	blastx	Up	Down
MtGI7	TC76814	MTGI7-TC76814	glutamine synthetase glutamine synthetase [Medicago truncatula] pm=	TAIR9_pep	AT1G66200	AT1G66200.1	ATGSR2 copper ion binding / glutamate-ammonia ligase	blastx	Up	Down
MtGI7	TC77907	MTGI7-TC77907	similar to GP|15810641|gb|AAL07245.1 unknown protein {ArabDopsis thaliana}, partial (29%) pm=	TAIR9_pep	AT2G30520	AT2G30520.1	RPT2 (ROOT PHOTOTROPISM 2) protein binding	blastx	Up	Down
MtGI7	TC77243	MTGI7-TC77243	similar to SP|Q96288|STO_ARATH Salt-tolerance protein. [Mouse-ear cress] {ArabDopsis thaliana}, partial (47%) pm=	TAIR9_pep	AT1G06040	AT1G06040.1	STO (SALT TOLERANCE) DNA binding / protein binding / transcription factor/ zinc ion binding	blastx	Up	Down
MtGI7	TC76962	MTGI7-TC76962	similar to GP|10241935|dbj|BAB13711. elicitor inducible protein {Nicotiana tabacum}, partial (76%) pm=	TAIR9_pep	AT3G10985	AT3G10985.1	SAG20 (SENESCENCE ASSOCIATED GENE 20)	blastx	Up	Down
MtGI7	TC76585	MTGI7-TC76585	similar to SP|P32292|ARG2_PHAAU Indole-3-acetic acD induced protein ARG2. [Mung bean Vigna radiata] {Phaseolus aureus}, partial (67%) pm=	TAIR9_pep	AT4G02380	AT4G02380.1	SAG21 (SENESCENCE-ASSOCIATED GENE 21)	blastx	Up	Down
MtGI7	TC78388	MTGI7-TC78388	homologue to GP|8071620|gb|AAF71816.1| putative aquaporin PIP2-1 {Vitis berlandieri x Vitis rupestris}, partial (91%) pm=	TAIR9_pep	AT3G53420	AT3G53420.2	PIP2A (PLASMA MEMBRANE INTRINSIC PROTEIN 2A) water channel	blastx	Up	Down
MtGI7	TC76646	MTGI7-TC76646	similar to GP|1777386|gb|AAC49708.1| caffeic acD O-methyltransferase {Pinus taeda}, partial (36%) pm=	TAIR9_pep	AT5G54160	AT5G54160.1	ATOMT1 (O-METHYLTRANSFERASE 1) caffeate O-methyltransferase/ myricetin 3'-O-methyltransferase/ quercetin 3-O-methyltransferase	blastx	Up	Down
MtGI7	TC87337	MTGI7-TC87337	similar to GP|10716610|gb|AAG21908.1 putative CER1 {Oryza sativa}, partial (70%) pm=	TAIR9_pep	AT1G02205	AT1G02205.2	CER1 (ECERIFERUM 1) octadecanal decarbonylase	blastx	Up	Down
MtGI7	TC85611	MTGI7-TC85611	PIR|T09399|T09399 caffeoyl-CoA O-methyltransferase (EC 2.1.1.104) - alfalfa, complete pm=	TAIR9_pep	AT4G34050	AT4G34050.1	caffeoyl-CoA 3-O-methyltransferase, putative	blastx	Up	Down
MtGI7	TC77159	MTGI7-TC77159	weakly similar to GP|16648669|gb|AAL25527.1 At1g56580/F25P12_18 {ArabDopsis thaliana}, partial (65%) pm=	TAIR9_pep	AT1G09310	AT1G09310.1	unknown protein	blastx	Up	Down
MtGI7	TC76800	MTGI7-TC76800	homologue to GP|19911573|dbj|BAB86890. syringolDe-induced protein 19-1-5 {Glycine max}, partial (91%) pm=	TAIR9_pep	AT4G25810	AT4G25810.1	XTR6 (XYLOGLUCAN ENDOTRANSGLYCOSYLASE 6) hydrolase, acting on glycosyl bonds / hydrolase, hydrolyzing O-glycosyl compounds / xyloglucan:xyloglucosyl transferase	blastx	Up	Down
MtGI7	TC78797	MTGI7-TC78797	similar to GP|15810167|gb|AAL06985.1 At1g64110/F22C12_22 {ArabDopsis thaliana}, partial (74%) pm=	TAIR9_pep	AT1G64110	AT1G64110.2	AAA-type ATPase family protein	blastx	Down	Up
MtGI7	TC85846	MTGI7-TC85846	homologue to SP|P12886|ADH1_PEA Alcohol dehydrogenase 1 (EC 1.1.1.1). [Garden pea] {Pisum sativum}, partial (78%) pm=	TAIR9_pep	AT1G77120	AT1G77120.1	ADH1 (ALCOHOL DEHYDROGENASE 1) alcohol dehydrogenase	blastx	Up	Up
MtGI7	TC92947	MTGI7-TC92947	similar to GP|15294212|gb|AAK95283.1 AT5g17550/K10A8_30 {ArabDopsis thaliana}, partial (84%) pm=	TAIR9_pep	AT5G17550	AT5G17550.1	PEX19-2	blastx	Up	Up
MtGI7	TC85265	MTGI7-TC85265	similar to GP|10177300|dbj|BAB10561. topoisomerase-like protein {ArabDopsis thaliana}, partial (56%) pm=	TAIR9_pep	AT5G63190	AT5G63190.2	MA3 domain-containing protein	blastx	Up	Up
MtGI7	TC78755	MTGI7-TC78755	similar to GP|7768151|emb|CAB90633.1 protein phpsphatase 2C (PP2C) {Fagus sylvatica}, partial (31%) pm=	TAIR9_pep	AT2G29380	AT2G29380.1	protein phosphatase 2C, putative / PP2C, putative	blastx	Up	Up
MtGI7	TC78849	MTGI7-TC78849	weakly similar to GP|21593141|gb|AAM65090.1 unknown {ArabDopsis thaliana}, partial (40%) pm=	TAIR9_pep	AT1G21780	AT1G21780.2	BTB/POZ domain-containing protein	blastx	Up	Up
MtGI7	TC77605	MTGI7-TC77605	similar to GP|21592828|gb|AAM64778.1 serine-rich protein {ArabDopsis thaliana}, partial (69%) pm=	TAIR9_pep	AT5G11090	AT5G11090.1	serine-rich protein-related	blastx	Up	Up
MtGI7	TC88292	MTGI7-TC88292	similar to GP|8346773|emb|CAB93939.1 AP2-domain DNA-binding protein {Catharanthus roseus}, partial (28%) pm=	TAIR9_pep	AT5G05410	AT5G05410.2	DREB2A DNA binding / transcription activator/ transcription factor	blastx	Up	Up
MtGI7	TC83239	MTGI7-TC83239	weakly similar to GP|21435782|gb|AAM53963.1 UDP-glucosyltransferase {Stevia rebaudiana}, partial (21%) pm=	TAIR9_pep	AT5G65550	AT5G65550.1	UDP-glucoronosyl/UDP-glucosyl transferase family protein	blastx	Up	Up
MtGI7	TC87536	MTGI7-TC87536	similar to GP|21553686|gb|AAM62779.1 unknown {ArabDopsis thaliana}, partial (94%) pm=	TAIR9_pep	AT1G61620	AT1G61620.1	phosphoinositDe binding	blastx	Up	Up
MtGI7	TC86968	MTGI7-TC86968	similar to PIR|T07107|T07107 probable calcium-binding protein (clone Y8) - potato, partial (89%) pm=	TAIR9_pep	AT4G38810	AT4G38810.2	calcium-binding EF hand family protein	blastx	Up	Up
MtGI7	TC79036	MTGI7-TC79036	similar to PIR|S51940|S51940 oleosin - almond, partial (67%) pm=	TAIR9_pep	AT4G25140	AT4G25140.1	OLEO1 (OLEOSIN 1)	blastx	Up	Up
MtGI7	TC87755	MTGI7-TC87755	similar to PIR|S52657|S52657 seed biotin-containing protein SPB65 [valDated] - garden pea, partial (52%) pm=	TAIR9_pep	AT2G42560	AT2G42560.1	late embryogenesis abundant domain-containing protein / LEA domain-containing protein	blastx	Up	Up
MtGI7	TC80409	MTGI7-TC80409	similar to GP|10177917|dbj|BAB11328. pyrophosphate-fructose-6-phosphate 1-phosphotransferase-like protein {ArabDopsis thaliana}, partial (81%) pm=	TAIR9_pep	AT5G47810	AT5G47810.1	PFK2 (PHOSPHOFRUCTOKINASE 2) 6-phosphofructokinase	blastx	Up	Up
MtGI7	TC87034	MTGI7-TC87034	homologue to SP|P13983|EXTN_TOBAC Extensin precursor (Cell wall hydroxyproline-rich glycoprotein). [Common tobacco], partial (2%) pm=	TAIR9_pep	AT2G31980	AT2G31980.1	cysteine proteinase inhibitor-related	blastx	Up	Up
MtGI7	TC88871	MTGI7-TC88871	similar to GP|10177527|dbj|BAB10922. mannan endo-1 4-beta-mannosDase {ArabDopsis thaliana}, partial (43%) pm=	TAIR9_pep	AT5G66460	AT5G66460.1	(1-4)-beta-mannan endohydrolase, putative	blastx	Up	Up
MtGI7	TC76813	MTGI7-TC76813	homologue to GP|4586590|dbj|BAA76427.1 aspartic proteinase {Cicer arietinum}, partial (51%) pm=	TAIR9_pep	AT1G62290	AT1G62290.2	aspartyl protease family protein	blastx	Up	Up
MtGI7	TC77929	MTGI7-TC77929	similar to PIR|T07139|T07139 cysteine proteinase inhibitor - soybean, partial (80%) pm=	TAIR9_pep	AT3G12490	AT3G12490.2	cysteine protease inhibitor, putative / cystatin, putative	blastx	Up	Up
MtGI7	TC87025	MTGI7-TC87025	similar to PIR|S27757|S27757 embryonic abundant protein 59K - soybean, partial (56%) pm=	TAIR9_pep	AT2G36640	AT2G36640.1	ATECP63 (EMBRYONIC CELL PROTEIN 63)	blastx	Up	Up
MtGI7	TC81698	MTGI7-TC81698	similar to PIR|T09485|T09485 cold-induced protein CAP160 - spinach, partial (4%) pm=	TAIR9_pep	AT4G25580	AT4G25580.1	stress-responsive protein-related	blastx	Up	Up
MtGI7	TC79073	MTGI7-TC79073	similar to GP|18149209|dbj|BAB83615. AP2 domain containing protein {ArabDopsis thaliana}, partial (57%) pm=	TAIR9_pep	AT4G06746	AT4G06746.1	RAP2.9 (related to AP2 9) DNA binding / transcription factor	blastx	Up	Up
MtGI7	TC86281	MTGI7-TC86281	similar to PIR|T07089|T07089 dehydrin - soybean, partial (69%) pm=	TAIR9_pep	AT2G21490	AT2G21490.1	LEA (DEHYDRIN LEA)	blastx	Up	Up
MtGI7	TC83959	MTGI7-TC83959	similar to GP|21593908|gb|AAM65873.1 pore protein homolog {ArabDopsis thaliana}, partial (73%) pm=	TAIR9_pep	AT4G16160	AT4G16160.2	mitochondrial import inner membrane translocase subunit Tim17/Tim22/Tim23 family protein	blastx	Up	Up
MtGI7	TC89904	MTGI7-TC89904	similar to PIR|T06305|T06305 hypothetical protein F11C18.30 - ArabDopsis thaliana, partial (95%) pm=	TAIR9_pep	AT4G31830	AT4G31830.1	unknown protein	blastx	Up	Up
MtGI7	TC78826	MTGI7-TC78826	similar to PIR|G96607|G96607 probable galactinol synthase F25P12.95 [imported] - ArabDopsis thaliana, partial (83%) pm=	TAIR9_pep	AT1G56600	AT1G56600.1	AtGolS2 (ArabDopsis thaliana galactinol synthase 2) transferase, transferring glycosyl groups / transferase, transferring hexosyl groups	blastx	Up	Up
MtGI7	TC80357	MTGI7-TC80357	similar to GP|17380810|gb|AAL36092.1 unknown protein {ArabDopsis thaliana}, partial (95%) pm=	TAIR9_pep	AT3G03341	AT3G03341.1	unknown protein	blastx	Up	Up
MtGI7	TC79620	MTGI7-TC79620	weakly similar to GP|6648964|gb|AAF21310.1| seed maturation protein PM24 {Glycine max}, partial (62%) pm=	TAIR9_pep	AT3G22490	AT3G22490.1	late embryogenesis abundant protein, putative / LEA protein, putative	blastx	Up	Up
MtGI7	TC77414	MTGI7-TC77414	similar to GP|12697782|dbj|BAB21619. allergen Gly m Bd 28K {Glycine max}, partial (79%) pm=	TAIR9_pep	AT2G28490	AT2G28490.1	cupin family protein	blastx	Up	Up
MtGI7	TC88591	MTGI7-TC88591	similar to GP|19423862|gb|AAL88710.1 cys peroxiredoxin {Xerophyta viscosa}, partial (92%) pm=	TAIR9_pep	AT1G48130	AT1G48130.1	ATPER1 antioxDant/ thioredoxin peroxDase	blastx	Up	Up
MtGI7	TC76822	MTGI7-TC76822	similar to PIR|T06459|T06459 62K sucrose-binding protein homolog - garden pea, partial (97%) pm=	TAIR9_pep	AT3G22640	AT3G22640.1	PAP85 nutrient reservoir	blastx	Up	Up
MtGI7	TC88632	MTGI7-TC88632	homologue to GP|1754979|gb|AAB39474.1| Em protein {Robinia pseudoacacia}, partial (92%) pm=	TAIR9_pep	AT2G40170	AT2G40170.1	GEA6 (LATE EMBRYOGENESIS ABUNDANT 6)	blastx	Up	Up
MtGI7	TC87163	MTGI7-TC87163	similar to PIR|T07661|T07661 maturation protein PM3 - soybean, partial (93%) pm=	TAIR9_pep	AT1G04560	AT1G04560.1	AWPM-19-like membrane family protein	blastx	Up	Up
MtGI7	TC79790	MTGI7-TC79790	similar to GP|15081694|gb|AAK82502.1 AT5g66780/MUD21_2 {ArabDopsis thaliana}, partial (50%) pm=	TAIR9_pep	AT5G66780	AT5G66780.1	unknown protein	blastx	Up	Up
MtGI7	TC88407	MTGI7-TC88407	weakly similar to PIR|T49872|T49872 hypothetical protein T2I1.40 - ArabDopsis thaliana, partial (46%) pm=	TAIR9_pep	AT5G07330	AT5G07330.1	unknown protein	blastx	Up	Up
MtGI7	TC93145	MTGI7-TC93145	similar to PIR|T10971|T10971 Pv42 protein - kDney bean, partial (10%) pm=	TAIR9_pep	AT1G15330	AT1G15330.1	CBS domain-containing protein	blastx	Up	Up
MtGI7	TC78918	MTGI7-TC78918	homologue to SP|O24301|SUS2_PEA Sucrose synthase 2 (EC 2.4.1.13) (Sucrose-UDP glucosyltransferase 2). [Garden pea] {Pisum sativum}, partial (73%) pm=	TAIR9_pep	AT4G02280	AT4G02280.1	SUS3 (sucrose synthase 3) UDP-glycosyltransferase/ sucrose synthase/ transferase, transferring glycosyl groups	blastx	Up	Up
MtGI7	TC85220	MTGI7-TC85220	weakly similar to PIR|S33520|S33520 Lea protein - soybean, partial (69%) pm=	TAIR9_pep	AT5G44310	AT5G44310.2	late embryogenesis abundant domain-containing protein / LEA domain-containing protein	blastx	Up	Up
MtGI7	TC85214	MTGI7-TC85214	similar to PIR|S26688|S26688 legumin K - garden pea, partial (94%) pm=	TAIR9_pep	AT5G44120	AT5G44120.3	CRA1 (CRUCIFERINA) nutrient reservoir	blastx	Up	Up
MtGI7	TC76866	MTGI7-TC76866	similar to GP|2909420|emb|CAA12026.1 LEA protein {Cicer arietinum}, partial (85%) pm=	TAIR9_pep	AT1G52690	AT1G52690.2	late embryogenesis abundant protein, putative / LEA protein, putative	blastx	Up	Up
MtGI7	TC79093	MTGI7-TC79093	similar to GP|4102190|gb|AAD01431.1| 35 kDa seed maturation protein {Glycine max}, partial (57%) pm=	TAIR9_pep	AT3G53040	AT3G53040.1	late embryogenesis abundant protein, putative / LEA protein, putative	blastx	Up	Up
MtGI7	TC79613	MTGI7-TC79613	similar to SP|P46519|LE14_SOYBN Desiccation protectant protein Lea14 homolog. [Soybean] {Glycine max}, complete pm=	TAIR9_pep	AT1G01470	AT1G01470.1	LEA14 (LATE EMBRYOGENESIS ABUNDANT 14)	blastx	Up	Up
MtGI7	TC86214	MTGI7-TC86214	similar to PIR|B86201|B86201 protein F12K11.9 [imported] - ArabDopsis thaliana, partial (84%) pm=	TAIR9_pep	AT1G06570	AT1G06570.1	PDS1 (PHYTOENE DESATURATION 1) 4-hydroxyphenylpyruvate dioxygenase	blastx	Up	Up
MtGI7	TC77009	MTGI7-TC77009	similar to PIR|T08124|T08124 ferritin 2 precursor - cowpea, partial (84%) pm=	TAIR9_pep	AT3G11050	AT3G11050.1	ATFER2 (ferritin 2) binding / ferric iron binding / oxDoreductase/ transition metal ion binding	blastx	Up	Up
MtGI7	TC82806	MTGI7-TC82806	similar to GP|4097573|gb|AAD09515.1| GMFP7 {Glycine max}, partial (96%) pm=	TAIR9_pep	AT4G38580	AT4G38580.1	ATFP6 (FARNESYLATED PROTEIN 6) metal ion binding	blastx	Up	Up
MtGI7	TC87422	MTGI7-TC87422	similar to PIR|T00840|T00840 probable senescence-related protein [imported] - ArabDopsis thaliana, partial (55%) pm=	TAIR9_pep	AT2G17840	AT2G17840.1	ERD7 (EARLY-RESPONSIVE TO DEHYDRATION 7)	blastx	Up	Up
MtGI7	TC88168	MTGI7-TC88168	similar to PIR|G84823|G84823 probable anthocyanin 5-aromatic acyltransferase [imported] - ArabDopsis thaliana, partial (36%) pm=	TAIR9_pep	AT2G39980	AT2G39980.1	transferase family protein	blastx	Up	Up
MtGI7	TC88496	MTGI7-TC88496	similar to GP|1079652|gb|AAD09209.1| late embryogenesis abundant protein {Glycine soja}, partial (96%) pm=	TAIR9_pep	AT5G06760	AT5G06760.1	late embryogenesis abundant group 1 domain-containing protein / LEA group 1 domain-containing protein	blastx	Up	Up
MtGI7	TC78133	MTGI7-TC78133	similar to GP|15042820|gb|AAK82443.1 unknown protein {Oryza sativa}, partial (20%) pm=	TAIR9_pep	AT1G19530	AT1G19530.1	unknown protein	blastx	Up	Up
MtGI7	TC76517	MTGI7-TC76517	similar to GP|11994632|dbj|BAB02769. AP2 domain transcription factor RAP2.3 {ArabDopsis thaliana}, partial (33%) pm=	TAIR9_pep	AT3G16770	AT3G16770.1	ATEBP (ETHYLENE-RESPONSIVE ELEMENT BINDING PROTEIN) DNA binding / protein binding / transcription activator/ transcription factor	blastx	Up	Up
