# Supplementary material for: The Re-Establishment of Desiccation Tolerance in Germinated Arabidopsis thaliana Seeds and Its Associated Transcriptome
Source: PLoS One. 2011 Dec 14;6(12):e29123. doi: 10.1371/journal.pone.0029123 (PMC3237594; doi:10.1371/journal.pone.0029123)
Supplement: Table S5 — Details of the heat maps displaying the gene expression profile during seed imbibition according to the Bio-Array Resource database. The top 50 up- and down-regulated genes in the DT/DS set were tested, in silico, for their expression during seed imbibition. (XLS) [file pone.0029123.s006.xls]

## Sheet: Sheet1
	Heat Maps _ Details
	Germination series - Imbibition time (0 to 24h)
	Up-regulated DT/DS genes
	0h	1h	3h	6h	12h	24h		Up	ID	Gene description
1	0	0.2	-0.1	-3.3	-2.3	-1.9		4.19811	At5g44120	249082_at| ATCRA1_CRA1_CRU1__RmlC-like cupins superfamily protein|
2	0.1	0.2	-0.2	-1.1	-1.9	-3.3		3.85058	At2g41260	266393_at| ATM17_M17__glycine-rich protein / late embryogenesis abundant protein (M17)|
3	0.5	0.8	0.3	-2.9	-1.6	-2.4		3.84443	At5g66400	247095_at| ATDI8_RAB18__Dehydrin family protein|
4	0.3	0.6	0.2	-1.8	-1.3	-2		3.68438	At3g22640	258327_at| PAP85__cupin family protein|
5	0.3	0.5	0.1	-3.4	-1.6	-2		3.67514	At4g25140	254095_at| OLE1_OLEO1__oleosin 1|
6	0.5	0.7	0.2	-1.5	-1.3	-2.4		3.63793	At1g73190	260088_at| ALPHA-TIP_TIP3;1__Aquaporin-like superfamily protein|
7	1	1.2	0.4	-1	-1.1	-2.3		3.63019	At2g21490	263753_at| LEA__dehydrin LEA|
8	0.5	0.8	0	-1.2	-1.5	-2.7		3.62025	At2g21820	263881_at| unknown protein; Has 45 Blast hits to 45 proteins in 13 species: Archae - 0; Bacteria - 0; Metazoa - 0; Fungi - 0; Plants - 45; Viruses - 0; Other Eukaryotes - 0 (source: NCBI BLink).|
9	0.6	0.8	0.3	-1.1	-1.3	-2.3		3.41892	At3g01570	259167_at| Oleosin family protein|
10	0	0.3	0	-3.6	-2.3	-1.9		3.38657	At4g28520	253767_at| CRC_CRU3__cruciferin 3|
11	1	1.2	-0.4	-0.8	-1.7	-2.3		3.38467	At5g07330	250624_at| unknown protein; FUNCTIONS IN: molecular_function unknown; INVOLVED IN: biological_process unknown; LOCATED IN: mitochondrion; BEST Arabidopsis thaliana protein match is: unknown protein (TAIR:AT1G63060.1); Has 1807 Blast hits to 1807 proteins in 277 species: Archae - 0; Bacteria - 0; Metazoa - 736; Fungi - 347; Plants - 385; Viruses - 0; Other Eukaryotes - 339 (source: NCBI BLink).|
12	0.3	0.6	0.2	-2.3	-1.7	-1.6		3.36028	At5g54740	248125_at| SESA5__seed storage albumin 5|
13	0.6	1	0.5	-1.1	-1.2	-3.4		3.31355	At2g41280	266392_at| ATM10_M10__late embryogenesis abundant protein (M10) / LEA protein M10|
14	0.5	0.7	0.3	-1.8	-1.2	-1.8		3.2713	At5g40420	249353_at| OLE2_OLEO2__oleosin 2|
15	0.8	0.9	0.2	-0.9	-1.4	-3.1		3.26624	At2g47770	266462_at| ATTSPO__TSPO(outer membrane tryptophan-rich sensory protein)-related|
16	0.5	0.7	0.2	-1	-1.2	-1.6		3.11598	At3g54940	251838_at| Papain family cysteine protease|
17	0.9	1.1	0.7	-1.3	-1	-1.3		3.08787	At3g15670	258224_at| Late embryogenesis abundant protein (LEA) family protein|
18	0.2	0.5	0	-2	-1.6	-1.8		3.04911	At1g48130	260716_at| ATPER1_PER1__1-cysteine peroxiredoxin 1|
19	0.5	0.8	-0.3	-2	-3.1	-5		3.01425	At2g40170	263385_at| ATEM6_EM6_GEA6__Stress induced protein|
20	0.7	0.8	0	-1.2	-1.4	-2.4		3.01407	At3g17520	258347_at| Late embryogenesis abundant protein (LEA) family protein|
21	0.3	0.6	0.1	-1.6	-1.5	-2.3		3.01383	At1g04560	264612_at| AWPM-19-like family protein|
22	1.1	1.4	0.3	-1	-1.7	-3.3		3.00942	At5g01300	251137_at| PEBP (phosphatidylethanolamine-binding protein) family protein|
23	0.8	1.1	0.2	-1.3	-2.1	-3.3		2.9977	At3g51810	246299_at| AT3_ATEM1_EM1_GEA1__Stress induced protein|
24	2	2.2	1.3	-0.6	-1.2	-3.1		2.98479	At3g22500	256938_at| ATECP31__Seed maturation protein|
25	1.5	2	1	-0.8	-2.1	-4		2.81796	At2g23240	245070_at| Plant EC metallothionein-like protein, family 15|
26	0.5	0.6	0	-1.1	-1.7	-2.9		2.80725	At2g28490	264079_at| RmlC-like cupins superfamily protein|
27	1.4	1.6	0.4	-0.6	-1.4	-3.6		2.80556	At1g05510	263175_at| Protein of unknown function (DUF1264)|
28	0.3	0.6	0	-1.2	-1.4	-1.7		2.59413	At2g35300	266544_at| LEA18__Late embryogenesis abundant protein, group 1 protein|
29	1.9	2.2	0.7	0	0	-0.1		2.54452	At1g32560	256464_at| Late embryogenesis abundant protein, group 1 protein|
30	1.2	1.5	0.6	-1	-1.5	-3.3		2.53975	At3g58450	251580_at| Adenine nucleotide alpha hydrolases-like superfamily protein|
31	1.2	1.5	0.4	-1.1	-1.5	-1.4		2.49514	At5g06760	250648_at| LEA4-5__Late Embryogenesis Abundant 4-5|
32	1.1	1.4	0.1	-0.6	-1.2	-2.3		2.49484	At2g25890	266654_at| Oleosin family protein|
33	1	1.1	0.4	-0.6	-1	-3		2.47947	At3g56350	251731_at| Iron/manganese superoxide dismutase family protein|
34	0.6	1	0.4	-1.8	-1.1	-1.8		2.4723	At1g54870	256354_at| NAD(P)-binding Rossmann-fold superfamily protein|
35	0.4	0.6	0	-0.3	-0.4	-1.7		2.47186	At4g02520	266746_s_at| ATGSTF2_ATPM24_ATPM24.1_GST2_GSTF2__glutathione S-transferase PHI 2|
36	1.5	1.7	1.1	0.4	0.3	-1.6		2.46097	At1g47980	259615_at| unknown protein; FUNCTIONS IN: molecular_function unknown; INVOLVED IN: biological_process unknown; LOCATED IN: endomembrane system; EXPRESSED IN: 6 plant structures; EXPRESSED DURING: 4 anthesis, F mature embryo stage, petal differentiation and expansion stage, E expanded cotyledon stage; BEST Arabidopsis thaliana protein match is: unknown protein (TAIR:AT3G62730.1); Has 169 Blast hit…
37	0.4	0.7	0	-0.9	-1.6	-3.4		2.42844	At4g09600	255048_at| GASA3__GAST1 protein homolog 3|
38	0.8	1	0.2	-0.7	-1.6	-2.1		2.41509	At2g36640	265211_at| ATECP63_ECP63__embryonic cell protein 63|
39	1.6	1.4	0	-1.6	-2.4	-2.8		2.40321	At5g52300	248352_at| LTI65_RD29B__CAP160 protein|
40	1.7	1.9	0.5	-0.8	-1	-1.3		2.3993	At4g21020	254440_at| Late embryogenesis abundant protein (LEA) family protein|
41	1.1	1.4	0.2	-1.7	-1.7	-2		2.39577	At2g38905	266143_at| Low temperature and salt responsive protein family|
42	2.4	2.8	1.3	-1.2	-2.8	-4.3		2.37681	At3g15280	257059_at| unknown protein; FUNCTIONS IN: molecular_function unknown; LOCATED IN: mitochondrion; EXPRESSED IN: 8 plant structures; EXPRESSED DURING: L mature pollen stage, 4 anthesis, petal differentiation and expansion stage; Has 36 Blast hits to 36 proteins in 15 species: Archae - 0; Bacteria - 0; Metazoa - 1; Fungi - 2; Plants - 33; Viruses - 0; Other Eukaryotes - 0 (source: NCBI BLink).|
43	1.9	2.2	-1.8	-2.8	-3.8	-5.6		2.35369	At2g42560	263492_at| late embryogenesis abundant domain-containing protein / LEA domain-containing protein|
44	0.9	1	-0.3	-1.8	-2.3	-4		2.35142	At3g53040	252019_at| late embryogenesis abundant protein, putative / LEA protein, putative|
45	1.4	1.6	0.3	-1.6	-2.4	-4.3		2.31658	At5g01670	251100_at| NAD(P)-linked oxidoreductase superfamily protein|
46	1	1.2	0	-1	-1.4	-3.4		2.30952	At1g17810	255905_at| BETA-TIP__beta-tonoplast intrinsic protein|
47	1.2	1.5	0	-0.9	-1.7	-3.6		2.30105	At1g27990	259578_at| unknown protein; BEST Arabidopsis thaliana protein match is: unknown protein (TAIR:AT5G52420.1); Has 86 Blast hits to 86 proteins in 15 species: Archae - 0; Bacteria - 0; Metazoa - 0; Fungi - 0; Plants - 84; Viruses - 0; Other Eukaryotes - 2 (source: NCBI BLink).|
48	1	1	0.6	-0.2	-1	-3.6		2.28971	At4g26740	253930_at| ATPXG1_ATS1_CLO1__seed gene 1|
49	-2	-1.8	-4.3	-1	-0.5	-0.4		2.25211	At2g31980	265672_at| AtCYS2_CYS2__PHYTOCYSTATIN 2|
50	1.5	1.5	-0.9	0	-0.4	-0.9		2.24752	At1g27461	264494_at| unknown protein; Has 30201 Blast hits to 17322 proteins in 780 species: Archae - 12; Bacteria - 1396; Metazoa - 17338; Fungi - 3422; Plants - 5037; Viruses - 0; Other Eukaryotes - 2996 (source: NCBI BLink).|
	Down-regulated DT/DS genes
	0h	1h	3h	6h	12h	24h		Down	ID	Gene description
1	-1.3	1.1	-1.8	-0.1	0	3.1		-3.20409	At5g46960	248823_s_at| Plant invertase/pectin methylesterase inhibitor superfamily protein|
2	-1.6	-0.7	-2.8	-2.6	0.8	3.4		-3.01803	At4g30280	253628_at| ATXTH18_XTH18__xyloglucan endotransglucosylase/hydrolase 18|
3	-1.8	-2.6	-2.8	-0.9	3.2	4.5		-2.75054	At2g45180	266123_at| Bifunctional inhibitor/lipid-transfer protein/seed storage 2S albumin superfamily protein|
4	-2.1	-2.7	-1.8	1.7	3.3	3.9		-2.71943	At1g02640	260914_at| ATBXL2_BXL2__beta-xylosidase 2|
5	-4.3	-4.6	-2	-1.7	-0.3	0.2		-2.61727	At4g08950	255064_at| EXO__Phosphate-responsive 1 family protein|
6	-3.1	-3.6	-1.4	0.2	2.5	3.1		-2.55297	At5g01040	251124_s_at| LAC8__laccase 8|
7	-1.3	-0.5	0	-0.8	-0.6	0.7		-2.54569	At3g46320	252562_s_at| Histone superfamily protein|
8	-5.6	-5.6	-3.6	0.7	1.4	1.8		-2.45535	At3g48140	252348_at| B12D protein|
9	-3.8	-2.9	-3.1	-3	-0.9	4.9		-2.42125	At4g01700	255595_at| Chitinase family protein|
10	-0.5	-1.7	-1.1	-1.1	-0.6	-0.1		-2.40045	At1g56430	259632_at| ATNAS4_NAS4__nicotianamine synthase 4|
11	-0.9	-1.9	-2.1	-1.8	-2.5	2.4		-2.39022	At5g49360	248622_at| ATBXL1_BXL1__beta-xylosidase 1|
12	-2.9	-2.9	-1.1	-0.8	0.7	2		-2.37684	At3g13520	256964_at| AGP12_ATAGP12__arabinogalactan protein 12|
13	-3.3	-2.3	0	2.5	2.4	3.2		-2.35333	At4g21870	254384_at| HSP20-like chaperones superfamily protein|
14	-2.8	-2.9	-2.1	-1	0.3	2.7		-2.35228	At5g43060	249187_at| Granulin repeat cysteine protease family protein|
15	0	0.2	-0.5	-2.3	-2.4	-0.5		-2.26702	At3g22840	258321_at| ELIP_ELIP1__Chlorophyll A-B binding family protein|
16	-2.7	-2.8	0.6	1.2	1.4	1.8		-2.25511	At5g39580	249459_at| Peroxidase superfamily protein|
17	-2.9	-2.3	-1.8	-0.2	0.7	2.3		-2.25109	At1g56580	245629_at| SVB__Protein of unknown function, DUF538|
18	-2.8	-1.4	-1	-0.9	-1	0.4		-2.25089	At1g09310	263709_at| Protein of unknown function, DUF538|
19	-1.6	-3.3	-2	0.2	1	3		-2.25045	At1g47400	261684_at| unknown protein; BEST Arabidopsis thaliana protein match is: unknown protein (TAIR:AT1G47395.1); Has 11 Blast hits to 11 proteins in 2 species: Archae - 0; Bacteria - 0; Metazoa - 0; Fungi - 0; Plants - 11; Viruses - 0; Other Eukaryotes - 0 (source: NCBI BLink).|
20	-1.3	-1.8	-1.1	-1.2	-0.9	1.9		-2.2418	At3g16370	259375_at| GDSL-like Lipase/Acylhydrolase superfamily protein|
21	-3.8	-4.3	-3.1	-1.5	2	3.2		-2.22448	At4g31500	253534_at| ATR4_CYP83B1_RED1_RNT1_SUR2__cytochrome P450, family 83, subfamily B, polypeptide 1|
22	-4.6	-3.4	0.2	2.3	2.5	3.1		-2.15731	At3g23730	257203_at| XTH16__xyloglucan endotransglucosylase/hydrolase 16|
23	-4.6	-23.2	-3.3	-1.7	-2.1	0.4		-2.15193	At4g30270	253666_at| MERI-5_MERI5B_SEN4_XTH24__xyloglucan endotransglucosylase/hydrolase 24|
24	-1.4	-1.3	1.3	0	-0.3	2		-2.09384	At1g55330	259664_at| AGP21_ATAGP21__arabinogalactan protein 21|
25	-2.5	-1.9	-0.4	-1.4	-1.7	0.2		-2.06393	At5g59870	247651_at| HTA6__histone H2A 6|
26	-1.1	-1.5	-1.8	-3	-0.6	2.5		-2.05799	At1g03870	265066_at| FLA9__FASCICLIN-like arabinoogalactan 9|
27	-2.2	-2.5	0	0.3	1.5	2.6		-2.0575	At3g43720	252711_at| Bifunctional inhibitor/lipid-transfer protein/seed storage 2S albumin superfamily protein|
28	-1.3	-2	-2.8	-3	-1.2	2.4		-2.05099	At1g06360	259391_s_at| Fatty acid desaturase family protein|
29	-3.3	-3.3	-2.9	-2.8	0.3	2.9		-2.01481	At5g01870	251065_at| Bifunctional inhibitor/lipid-transfer protein/seed storage 2S albumin superfamily protein|
30	-5	-4.6	-5	-4	0.3	2.8		-2.01224	At2g22170	263431_at| Lipase/lipooxygenase, PLAT/LH2 family protein|
31	-1.5	0.5	-0.2	-1.4	-0.4	-0.6		-2.00786	At3g26520	257313_at| GAMMA-TIP2_SITIP_TIP1;2_TIP2__tonoplast intrinsic protein 2|
32	-1.8	-2.6	-2.3	-0.4	1	2.2		-2.00535	At5g54160	248200_at| ATOMT1_OMT1__O-methyltransferase 1|
33	-1.5	-1.5	-1.5	-1.5	-0.3	2.4		-1.9735	At5g04530	250891_at| KCS19__3-ketoacyl-CoA synthase 19|
34	-5.6	-6.6	-3.3	0.3	2	2.2		-1.95248	At4g03210	255433_at| XTH9__xyloglucan endotransglucosylase/hydrolase 9|
35	-1.4	-2	-1.2	0	1	1.7		-1.94645	At5g10430	250437_at| AGP4_ATAGP4__arabinogalactan protein 4|
36	-1.3	-1.4	-2	-0.6	0.7	3.4		-1.93527	At5g45950	248921_at| GDSL-like Lipase/Acylhydrolase superfamily protein|
37	-0.2	0.4	-1.4	-0.6	-3.6	-0.4		-1.93239	At4g23680	254234_at| Polyketide cyclase/dehydrase and lipid transport superfamily protein|
38	-4	-3.4	0.8	1.8	1.9	1.7		-1.90932	At4g36880	246250_at| CP1__cysteine proteinase1|
39	-5	-4.6	-2.9	2.8	3.4	3.5		-1.88556	At1g28660	262733_s_at| GDSL-like Lipase/Acylhydrolase superfamily protein|
40	-3.6	-3.6	-3.4	-0.4	1	1.8		-1.86701	At1g54000	263153_s_at| GDSL-like Lipase/Acylhydrolase superfamily protein|
41	-0.6	-1.5	-1.9	-0.5	-0.3	1.3		-1.8661	At3g04290	258589_at| ATLTL1_LTL1__Li-tolerant lipase 1|
42	-2	-1.7	-1.1	-0.5	0.6	1.4		-1.86481	At5g54970	248139_at| unknown protein; BEST Arabidopsis thaliana protein match is: unknown protein (TAIR:AT4G26960.1); Has 1807 Blast hits to 1807 proteins in 277 species: Archae - 0; Bacteria - 0; Metazoa - 736; Fungi - 347; Plants - 385; Viruses - 0; Other Eukaryotes - 339 (source: NCBI BLink).|
43	-1.3	-1.4	-1.2	-1.4	-1	1.1		-1.86235	At4g14690	245306_at| ELIP2__Chlorophyll A-B binding family protein|
44	-0.7	1.1	1.8	0.6	0.8	0.6		-1.857	At4g27280	253915_at| Calcium-binding EF-hand family protein|
45	-1.5	-1.8	-1	-5	-0.6	3.3		-1.8568	At2g46740	266711_at| D-arabinono-1,4-lactone oxidase family protein|
46	-3.3	-4.3	-4.3	0.7	1.2	3.1		-1.84875	At1g73120	262373_at| unknown protein; FUNCTIONS IN: molecular_function unknown; INVOLVED IN: response to oxidative stress; EXPRESSED IN: root, cultured cell; Has 36 Blast hits to 36 proteins in 8 species: Archae - 0; Bacteria - 0; Metazoa - 0; Fungi - 0; Plants - 36; Viruses - 0; Other Eukaryotes - 0 (source: NCBI BLink).|
47	-5	-2	-2.7	-1.4	0.5	2.9		-1.83176	At4g21850	254387_at| ATMSRB9_MSRB9__methionine sulfoxide reductase B9|
48	-0.5	0	1.4	0.3	-0.3	0.5		-1.81979	At1g57990	245866_s_at| ATPUP18_PUP18__purine permease 18|
49	-5.6	-5	-5.6	-3.3	0.9	2.6		-1.81888	At1g12090	264371_at| ELP__extensin-like protein|
50	-2.5	-1.6	0.4	0.3	0	0.4		-1.79711	At5g65360	247192_at| Histone superfamily protein|
